# Supplementary material for: An efficient hybrid supercapacitor based on Zn–Mn–Ni–S@NiSe core–shell architectures
Source: Royal Society of Chemistry journal article supplement (doi:10.1039/d0se01665a), 2020-12-26
Supplement: d0se01665a1.pdf [file d0se01665a1.pdf]

## Supporting Information

### An efficient hybrid supercapacitor based on Zn-Mn-Ni-S@NiSe core-shell architectures

Akbar Mohammadi Zardkhoshoui\* and Saied Saeed Hosseiny Davarani\*

Department of Chemistry, Shahid Beheshti University, G. C., 1983963113, Evin, Tehran, Iran.

Corresponding authors: \*Tel: +98 21 22431661; Fax: +98 21 22431661; E-mail: [ss-hosseiny@sbu.ac.ir](mailto:ss-hosseiny@sbu.ac.ir) (S.S.H. Davarani); and [mohammadi.bahadoran@gmail.com](mailto:mohammadi.bahadoran@gmail.com) (A. Mohammadi Zardkhoshoui)

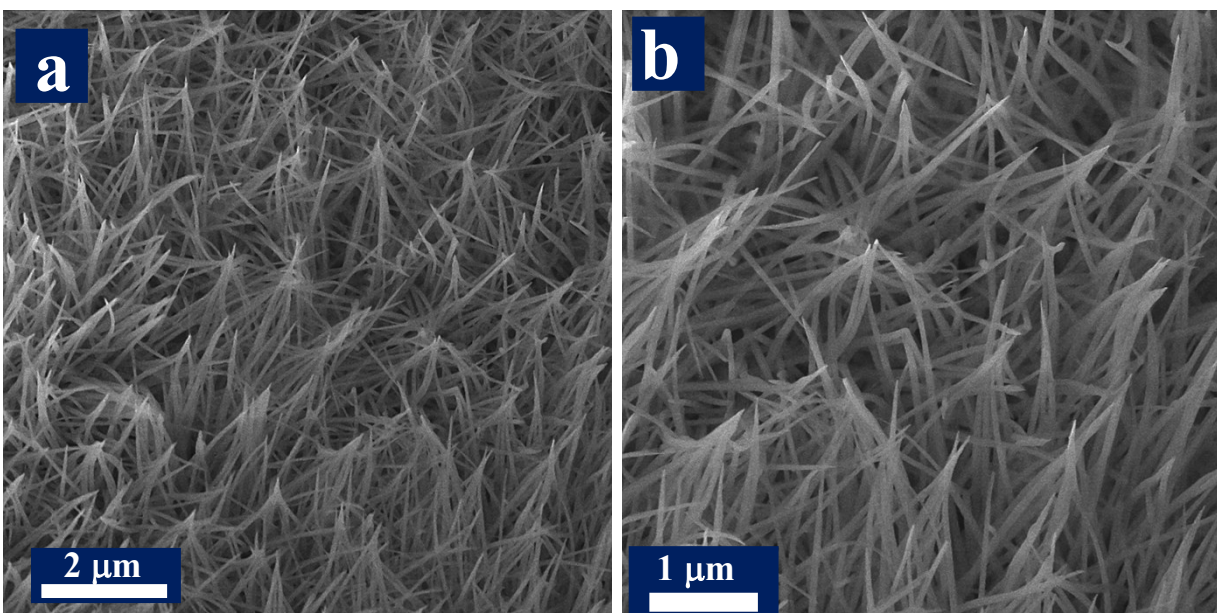

Fig. S1. FE-SEM images of the Zn-Mn-Ni-precursors.

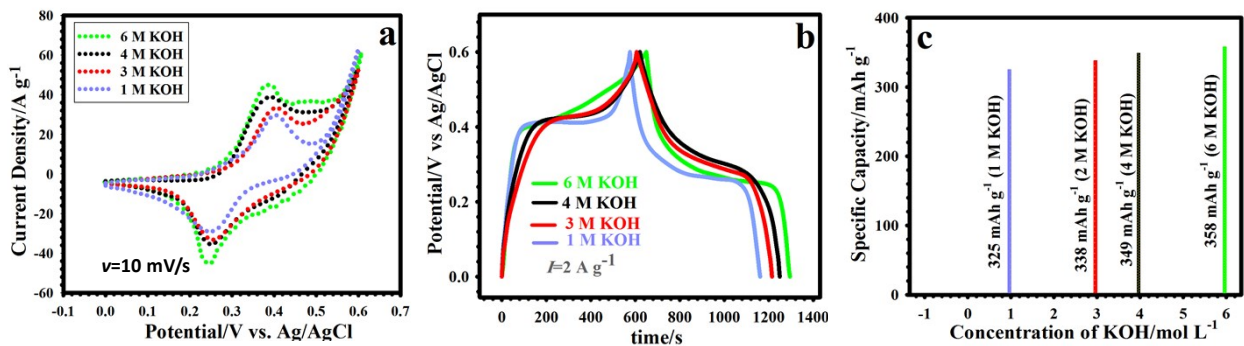

**Fig. S2.** CV curves of the optimized ZMNS@NSe electrode at 10 mV/s in various concentration of KOH electrolyte. (b) GCD plots of the optimized ZMNS@NSe electrode at 2 A/g in various concentration of KOH electrolyte. (c) The estimated capacity of the optimized ZMNS@NSe electrode in various concentration of KOH electrolyte at 2 A/g.

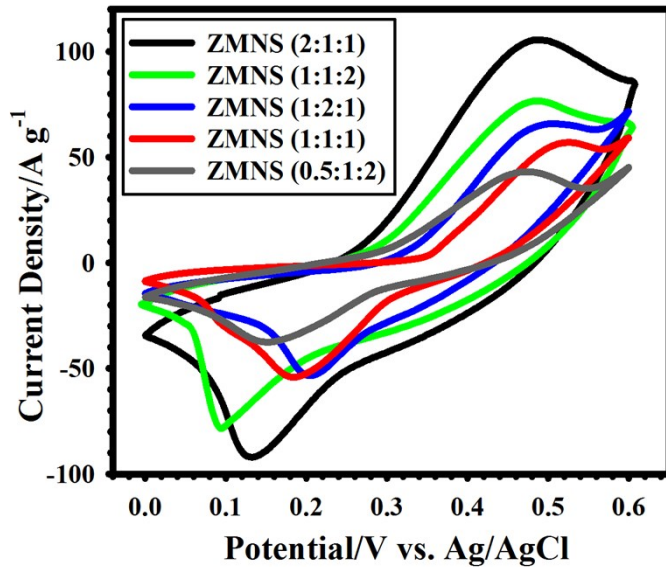

**Fig. S3.** CV curves of the ZMNS electrode at 60 mV/s in various molar ratios.

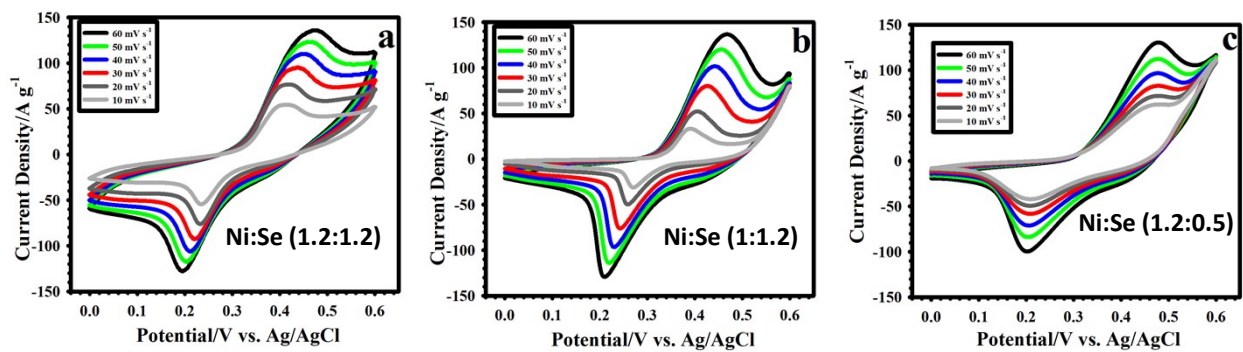

**Fig. S4.** (a-c) CV curves of the ZMNS@NSe electrode with several mmol ratios of the  $\text{NiCl}_2 \cdot 6\text{H}_2\text{O} : \text{SeO}_2$  at different sweep speeds.

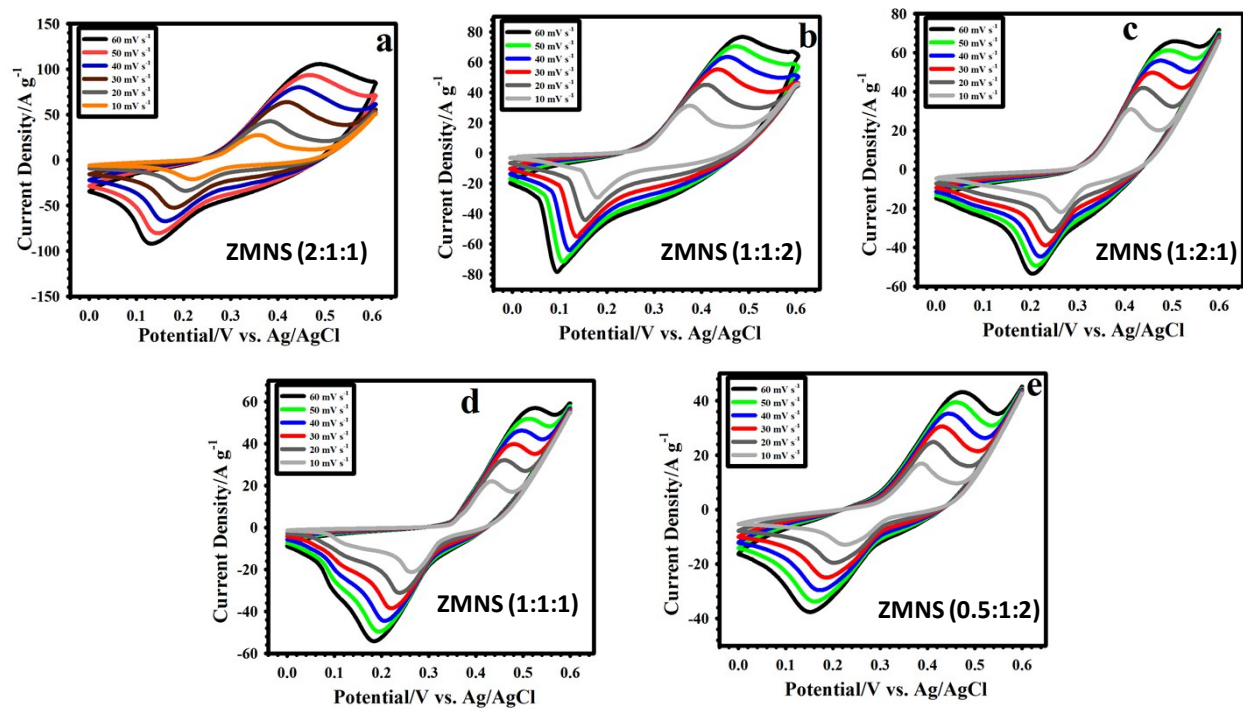

**Fig. S5.** (a-e) CV curves of the ZMNS electrode with various molar ratios at different sweep speeds.

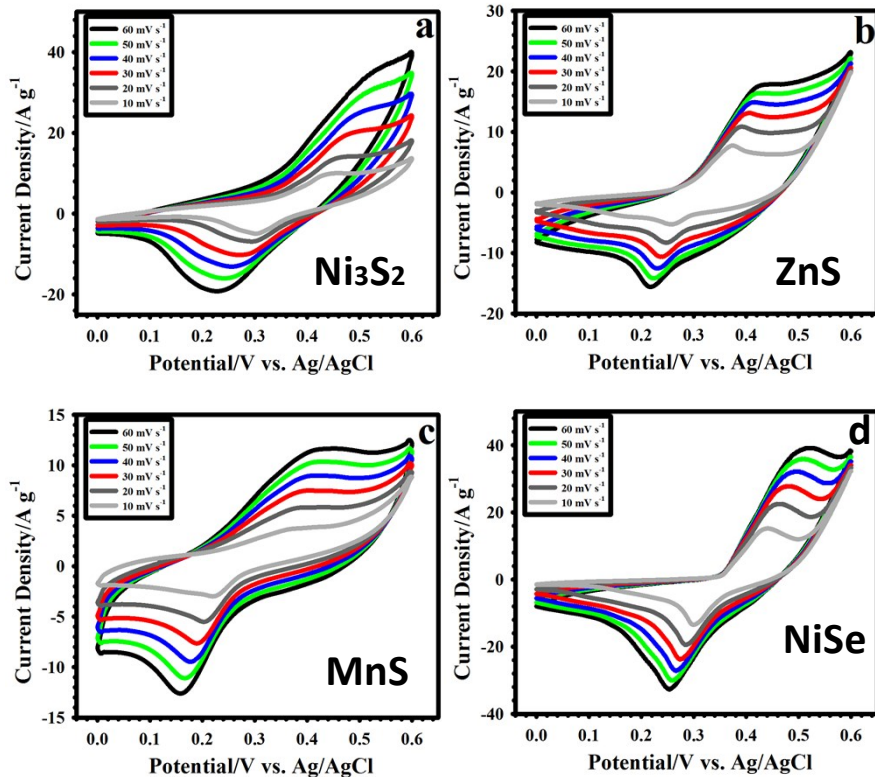

Fig. S6. CV curves of the (a)  $\text{Ni}_3\text{S}_2$ , (b)  $\text{ZnS}$ , (c)  $\text{MnS}$ , and (d)  $\text{NiSe}$  electrodes at different sweep speeds.

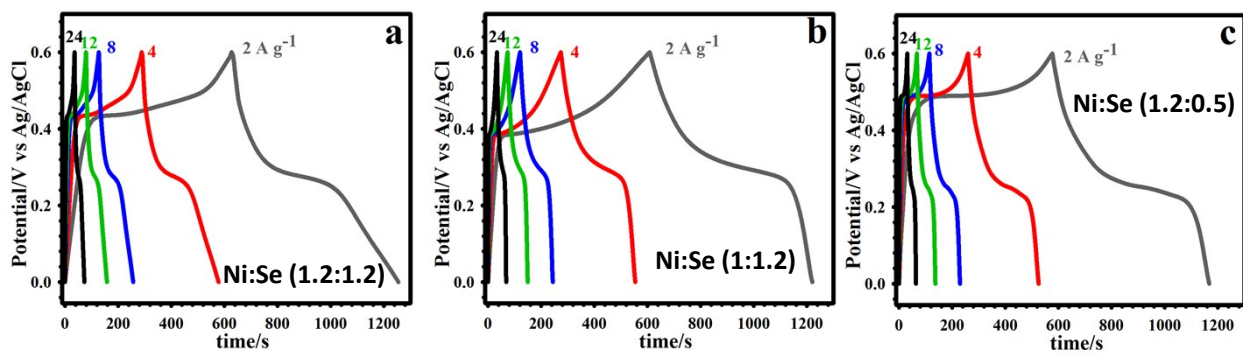

Fig. S7. (a-c) GCD plots of the  $\text{ZMNS@NSe}$  electrode with several mmol ratios of the  $\text{NiCl}_2 \cdot 6\text{H}_2\text{O} : \text{SeO}_2$  at different current densities.



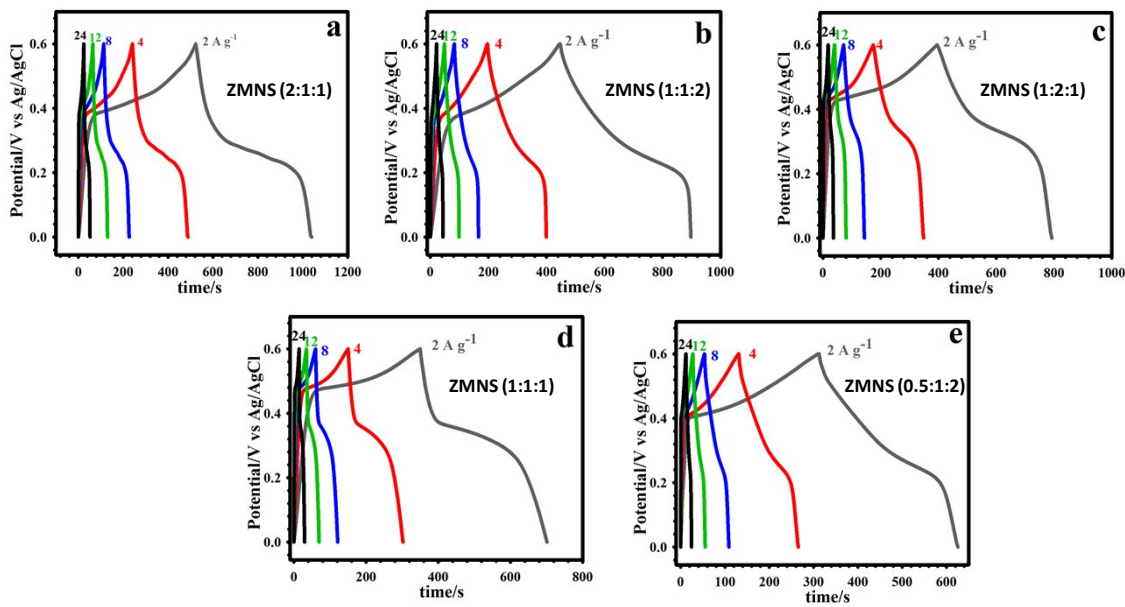

Fig. S8. (a-e) GCD plots of the ZMNS electrode with various molar ratios at different current densities.

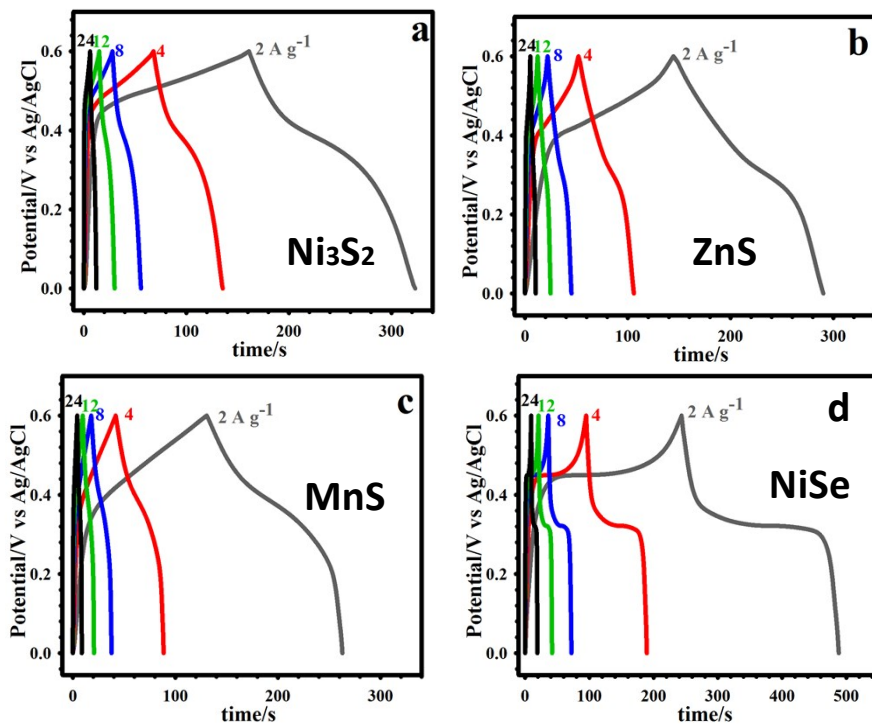

Fig. S9. GCD plots of the (a)  $\text{Ni}_3\text{S}_2$ , (b)  $\text{ZnS}$ , (c)  $\text{MnS}$ , and (d)  $\text{NiSe}$  electrodes at different current densities.

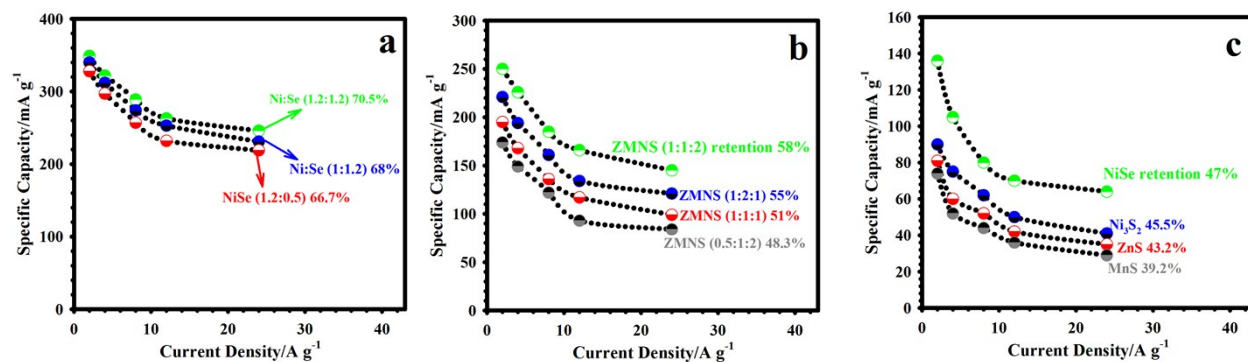

**Fig. S10.** (a) Rate capability of the ZMNS@NSe with several mmol ratios of the NiCl<sub>2</sub>.6H<sub>2</sub>O: SeO<sub>2</sub> (b), Rate capability of the ZMNS with various molar ratios. (c) Rate capability of the NiSe, Ni<sub>3</sub>S<sub>2</sub>, ZnS, and MnS electrodes.

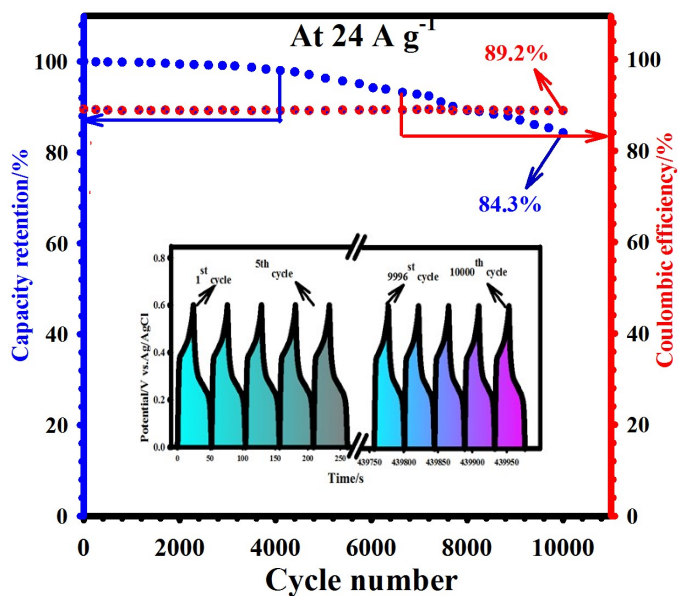

**Fig. S11.** The durability and Coulombic efficiency of the optimized ZMNS electrode at 24 A g<sup>-1</sup> (the inset presents the first and last five GCD cycles).

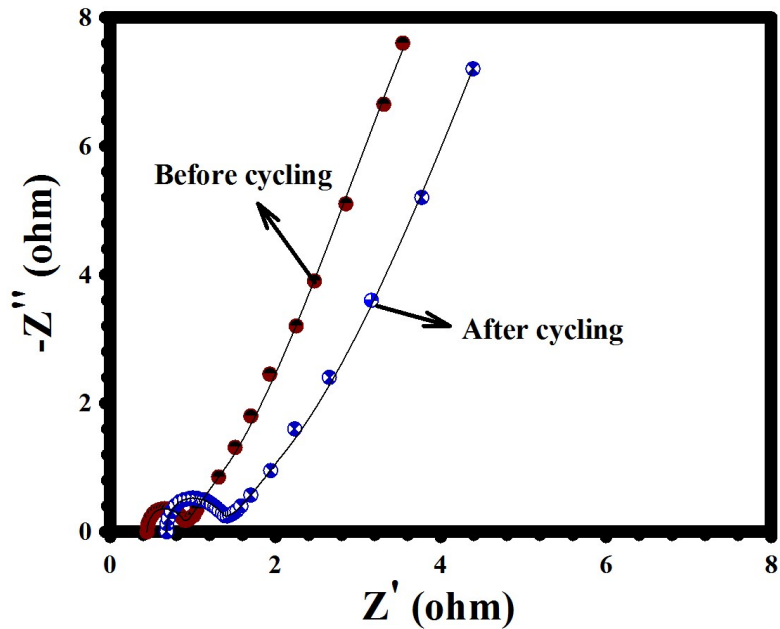

Fig. S12. Nyquist graphs of the optimized ZMNS before and after cycling.

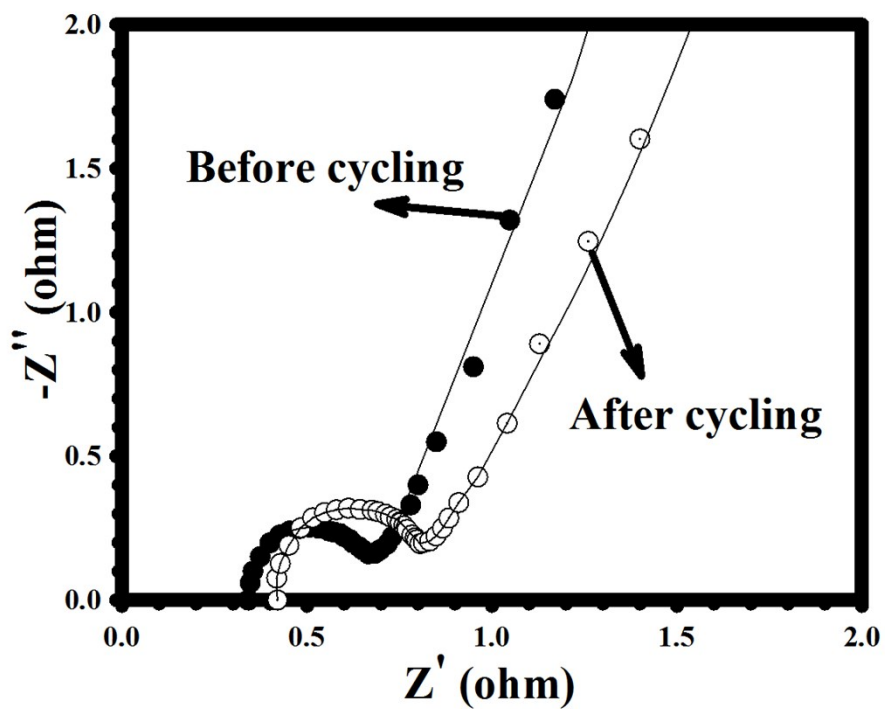

Fig. S13. Nyquist graphs of the optimized ZMNS@NSe before and after cycling.

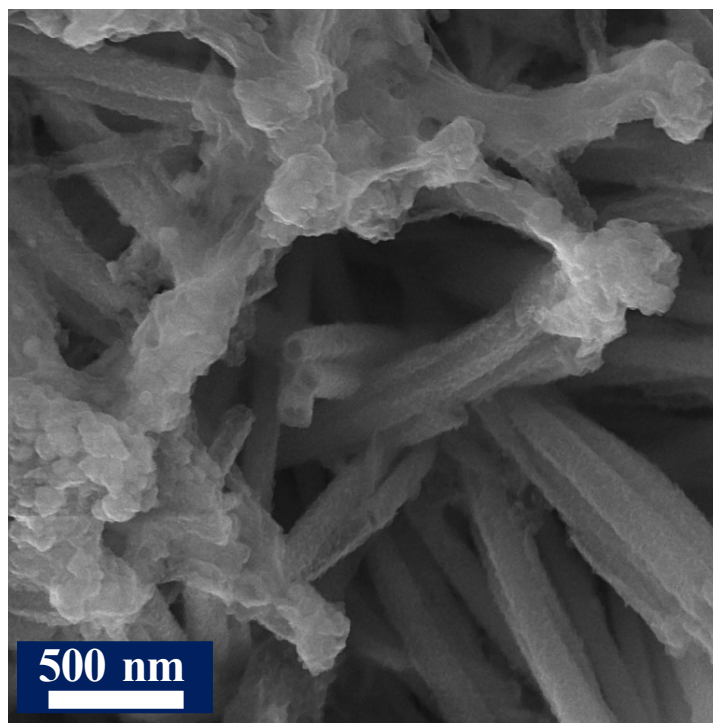

**Fig. S14.** FE-SEM image of the optimized ZMNS electrodes after cycling.

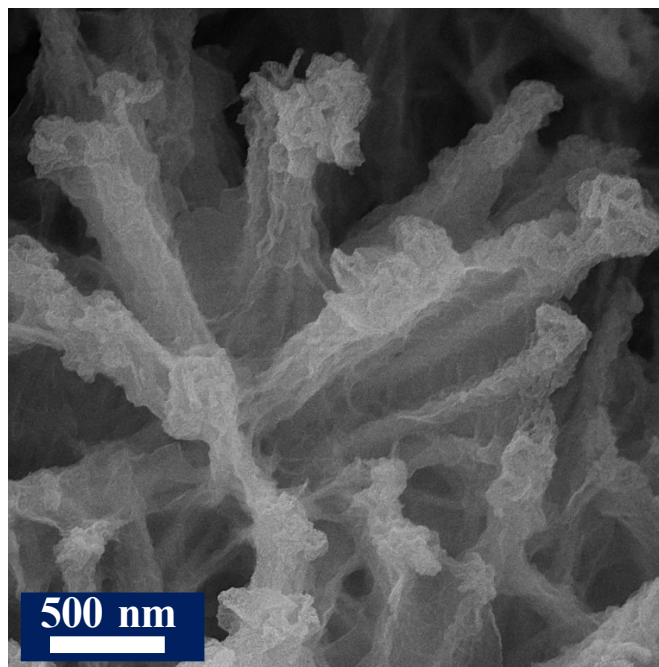

**Fig. S15.** FE-SEM of the optimized ZMNS@NSe after cycling.



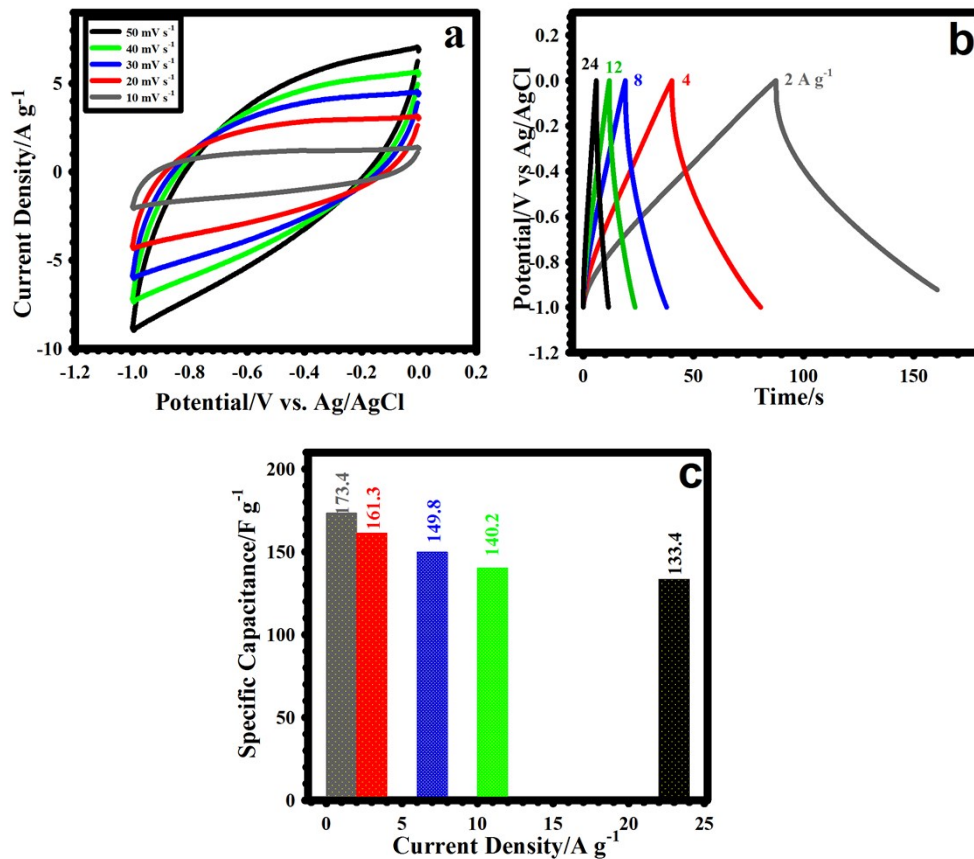

**Fig. S16.** (a) CV curves of the AC electrode at different sweep rates. (b) GCD profiles of the AC electrode at miscellaneous current densities. (c) Rate capability of the AC electrode.

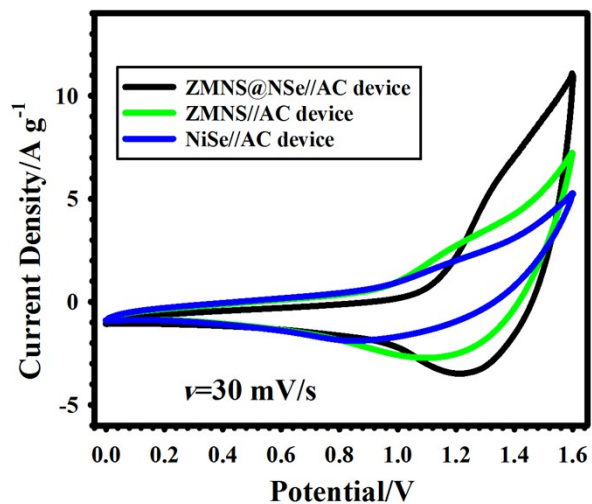

**Fig. S17.** CV curves of the ZMNS@NSe//AC, ZMNS//AC, and NiSe//AC at 30 mV/s.

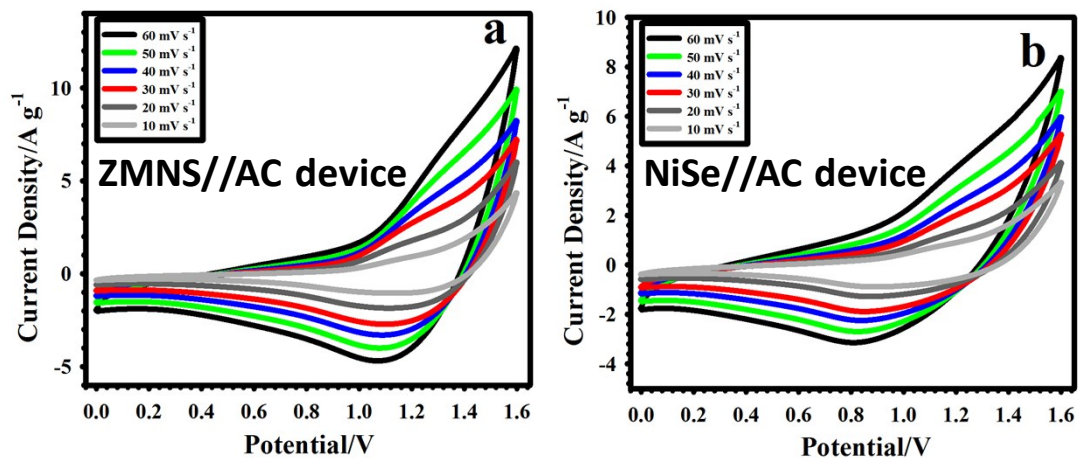

**Fig. S18.** (a) CV curves of the ZMNS//AC device at various scan rates. (b) CV curves of the NiSe//AC device at various scan rates.

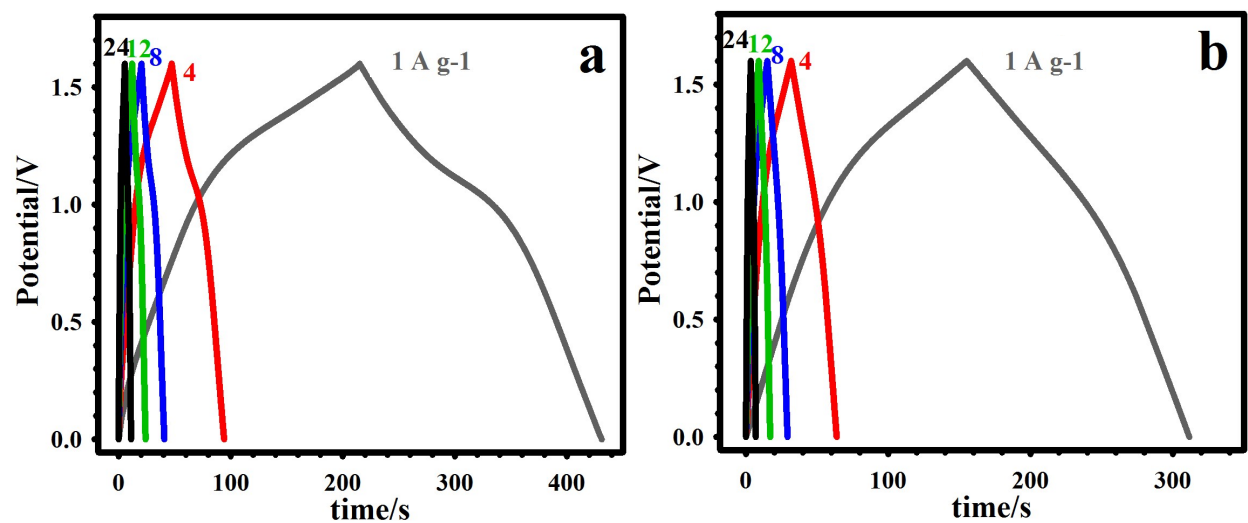

**Fig. S19.** (a) GCD plots of the ZMNS//AC device at various current densities. (b) GCD plots of the NiSe//AC device at various current densities.

**Table S1.** Comparison of the electrochemical performance of the optimized ZMNS@NSe electrode in three

| Composition                                             | Capacity/capacitance<br>3 and 2 electrodes<br>(mAh g <sup>-1</sup> , F g <sup>-1</sup> ) | Cycles, retention<br>2 and 3 electrode | ED (W h kg <sup>-1</sup> )<br>2 Electrode | Reference |
|---------------------------------------------------------|------------------------------------------------------------------------------------------|----------------------------------------|-------------------------------------------|-----------|
| W <sub>0.4</sub> Mo <sub>0.6</sub> O <sub>3</sub>       | 115.7 mAh g <sup>-1</sup> at 1 A g <sup>-1</sup> (3 E)                                   | 2000, 82.3% (2 E)                      | 20.2                                      | 1         |
| T-Nb <sub>2</sub> O <sub>5</sub> @Ni <sub>2</sub> P     | 105 mAh g <sup>-1</sup> at 1 A g <sup>-1</sup> (3 E)                                     | 5000, 90% (2 E)                        | 30.2                                      | 2         |
| MnCo <sub>2</sub> O <sub>4.5</sub> @Ni(OH) <sub>2</sub> | 318 mAh g <sup>-1</sup> at 3 A g <sup>-1</sup> (3 E)                                     | 5000, 87.3% (3 E)<br>3000, 90.4% (2 E) | 56.53                                     | 3         |
| SDBS-Ni <sub>2</sub> Co <sub>1</sub> PO <sub>4</sub>    | 191.6 mAh g <sup>-1</sup> at 1 A g <sup>-1</sup> (3 E)                                   | 2000, 77% (3 E)<br>2000, 76% (2 E)     | 36.5                                      | 4         |
| Ni <sub>2</sub> P-CNFs                                  | 145 mAh g <sup>-1</sup> at 1 A g <sup>-1</sup> (3 E)                                     | 6000, 88% (2 E)                        | 42                                        | 5         |
| Co <sub>3</sub> O <sub>4</sub> /Co(OH) <sub>2</sub>     | 184.9 mAh g <sup>-1</sup> at 1 A g <sup>-1</sup> (3 E)                                   | 5000, 90% (3 E)<br>5000, 91% (2 E)     | 37.6                                      | 6         |
| Co-Cd-Se                                                | 192 mAh g <sup>-1</sup> at 1 A g <sup>-1</sup> (3 E)                                     | 1000, 95.2% (3 E)<br>1000, 80.9% (2 E) | 57.6                                      | 7         |
| ZMNS@NSe                                                | 358 mAh g <sup>-1</sup> at 2 A g <sup>-1</sup> (3 E)                                     | 10000, 90.1 (3 E)<br>10000, 86.6 (2 E) | 59.6                                      | This work |

and two electrode systems with other previously reported electrodes.

## References

1 H. Peng, S. Cui, X. Xie, G. Wei, K. Sun, G. Ma and Z. Lei, *Electrochim. Acta* 2019, **322**, 134759.

2. F. Wang, H. Lei, H. Peng, J. Zhou, R. Zhao, J. Liang, G. Ma and Z. Lei, *Electrochim. Acta* 2019, **325**, 134934.
3. Y.-L. Liu, C. Yan, G.-G. Wang, H.-Y. Zhang, L.-Y. Dang, B.-W. Wu, Z.-Q. Lin, X.-S. An and J. Han, *ACS Appl. Mater. Interfaces* 2019, **11**, 9984-9993.
4. X. Zhang, N. Shang, S. Gao, C. Wang, Y. Gao and Z. Wang, *Appl. Surf. Sci.* 2019, **483**, 529-535.
5. H. Peng, J. Zhou, Z. Chen, R. Zhao, J. Liang, F. Wang, G. Ma and Z. Lei, *J. Alloys Compd.* 2019, **797**, 1095-1105.
- 6 G. Lee and J. Jang, *J. Power Sources* 2019, **423**, 115-124.
- 7 Z.-B. Zhai, K.-J. Huang and X. Wu, *Nano Energy*, 2018, **47**, 89-95.
